# Supplementary material
Source: Springer Nature journal article supplement (https://www.springermedizin.de/resource/supplementary/12865_2012_484_MOESM4_ESM.pdf/9428086)

**CD8 T CELLS****CD4 T CELLS****NK CELLS***Chlamydia* - negative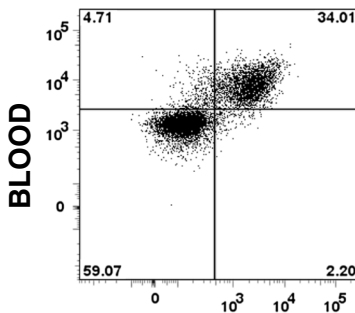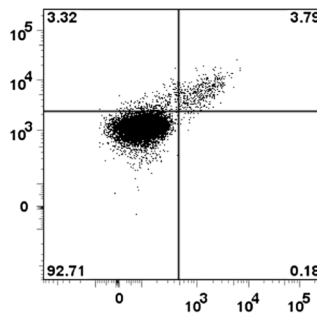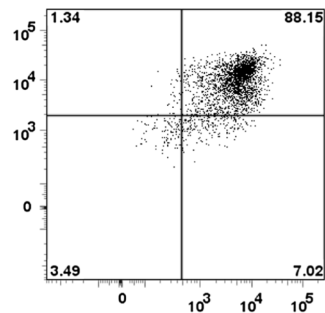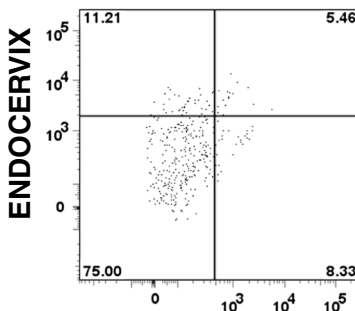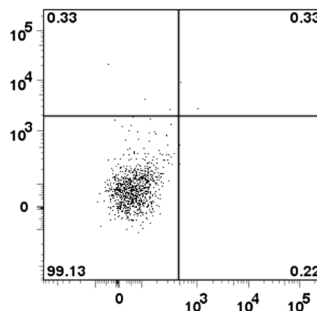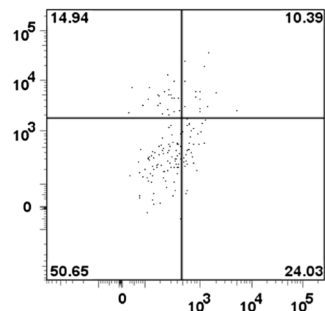*Chlamydia* - positive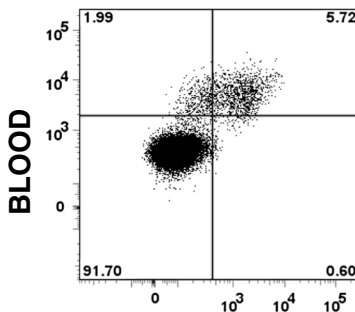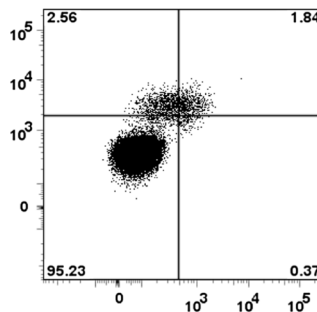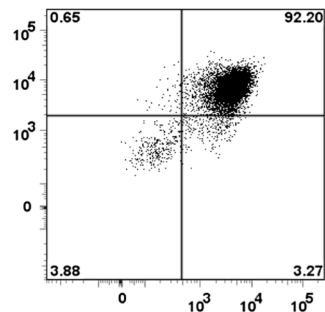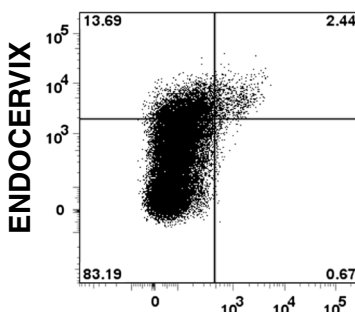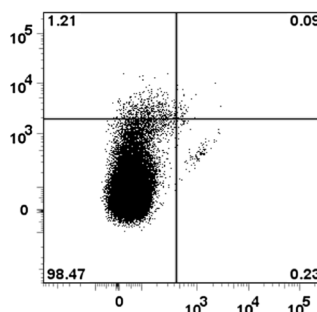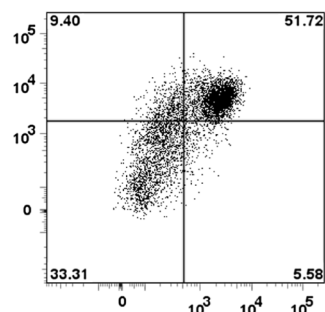**GRANZYME****PERFORIN**

Supplement: MOESM4 [file 9428086]
